# Supplementary material for: The Impact of COVID-19 Pandemic on Inequity in Routine Childhood Vaccination Coverage: A Systematic Review
Source: MDPI journal article supplement (doi:10.3390/vaccines10071013), 2022-06-24
Supplement: s1 [file s1]

## SUPPLEMENTARY MATERIAL

### File S1: Protocol registered with PROSPERO (CRD\_42021257431)

### File S2: Search strategy and numbers for each electronic database

Initial search :01 Jan 2020 – 30 April 2021)

Date of search: 30 April 2021

|                        | Nos. references | References after de-duplication |
|------------------------|-----------------|---------------------------------|
| Medline ALL            | 122             | 113                             |
| Embase                 | 125             | 93                              |
| Web of Science         | 45              | 11                              |
| Cochrane CENTRAL       | 1               | 1                               |
| Cochrane CDSR          | 1               | 1                               |
| Sociological Abstracts | 0               | 0                               |
| ASSIA                  | 5               | 5                               |
| MedRxiv                | 667             | 664                             |
| WHO                    | 8               | 0                               |
| <b>TOTAL</b>           | <b>974</b>      | <b>888</b>                      |
|                        |                 |                                 |
|                        |                 |                                 |

Date of updated search: 20 January 2022

|                        | Nos. references | References after de-duplication |
|------------------------|-----------------|---------------------------------|
| Medline ALL            | 248             | 246                             |
| Embase                 | 329             | 247                             |
| Web of Science         | 101             | 27                              |
| Cochrane CENTRAL       | 4               | 3                               |
| Cochrane CDSR          | 0               | 0                               |
| Sociological Abstracts | 7               | 6                               |
| ASSIA                  | 40              | 36                              |
| WHO                    | 12              | 0                               |
|                        |                 |                                 |
| <b>TOTAL</b>           | <b>741</b>      | <b>565</b>                      |
|                        |                 |                                 |
|                        |                 |                                 |

Initial and updated search used the identical search strategies for all databases except MedRxiv (indexed in PubMed from February 2020):

Database: Ovid MEDLINE(R) ALL <01 Jan 2020 to 30 April, 2021 & 1 May to 20 January 2022 >

Search Strategy:

- 
- 1 exp Coronavirus/ (69808)
  - 2 exp Coronavirus Infections/ (84886)
  - 3 (coronavirus\* or corona virus\* or OC43 or NL63 or 229E or HKU1 or HCoV\* or ncov\* or covid\* or sars-cov\* or sarscov\* or Sars-coronavirus\* or Severe Acute Respiratory Syndrome Coronavirus\* or "Kawasaki like paediatric inflammatory multisystem syndrome" or "Kawasaki like pediatric inflammatory multisystem syndrome" or "PIMS-TS" or "Kawa-COVID-19" or "MIS-C" or "multisystem inflammatory syndrome in children" or pediatric multisystem inflammatory disease).mp. (145733)
  - 4 (or/1-3) and ((20191\* or 202\*).dp. or 20190101:20301231.(ep).) [this set is the sensitive/broad part of the search] (132747)
  - 5 4 not (SARS or SARS-CoV or MERS or MERS-CoV or Middle East respiratory syndrome or camel\* or dromedar\* or equine or coronary or coronal or coidence\* or covidien or influenza virus or HIV or bovine or calves or TGEV or feline or porcine or BCoV or PED or PEDV or PDCoV or FIPV or FCoV or SADS-CoV or canine or CCov or zoonotic or avian influenza or H1N1 or H5N1 or H5N6 or IBV or murine corona\*).mp. [line 5 removes SARS, MERS and veterinary noise from the sensitive/broad search results] (49778)
  - 6 ((pneumonia or covid\* or coronavirus\* or corona virus\* or ncov\* or 2019-ncov or sars\*).mp. or exp pneumonia/) and Wuhan.mp. [Early articles about the outbreak] (5028)
  - 7 (2019-ncov or ncov19 or ncov-19 or 2019-novel CoV or sars-cov2 or sars-cov-2 or sarscov2 or sarscov-2 or SARS-2-nCoV or SARS-2-Cov or SARS-COV-19 or Sars-coronavirus2 or Sars-coronavirus-2 or SARS 2 coronavirus\* or Severe Acute Respiratory Syndrome-CoV-2 or SARS-like coronavirus\* or coronavirus-19 or covid19 or covid-19 or covid 2019 or ((novel or new or nouveau) adj2 (CoV or nCoV or covid or coronavirus\* or corona virus or Pandemi\*2)) or ((covid or covid19 or covid-19 or SARS-CoV-2) and pandemic\*2) or (coronavirus\* and pneumonia)).mp. [specific to Covid-19, Covid pneumonia, Covid pandemic] (130870)
  - 8 or/1-7 (151701)
  - 9 exp Vaccines/ or vaccin\*.mp. or exp Vaccination/ (405200)
  - 10 exp mass vaccination/ (3194)
  - 11 exp viral vaccines/ or viral vaccin\*.mp. (116800)
  - 12 exp vaccination coverage/ (1527)
  - 13 exp Immunization Programs/ or exp Immunization/ or immunisation.mp. (193014)
  - 14 immuni\*.mp. (470987)
  - 15 9 or 10 or 11 or 12 or 13 or 14 (747928)
  - 16 inequality.mp. or exp Socioeconomic Factors/ (478738)
  - 17 inequalit\*.mp. (38595)
  - 18 exp Poverty/ or poverty.mp. (63017)
  - 19 healthcare disparities.mp. or exp Healthcare Disparities/ (19556)
  - 20 exp Health Services Accessibility/ (115944)
  - 21 exp Income/ or income.mp. (184412)
  - 22 exp Social Class/ or social status.mp. or social class.mp. (52640)
  - 23 exp Educational Status/ or educat\*.mp. [mp=title, abstract, original title, name of substance word, subject heading word, floating sub-heading word, keyword heading word, organism

supplementary concept word, protocol supplementary concept word, rare disease supplementary concept word, unique identifier, synonyms] (1079487)

- 24 exp Health Status Disparities/ or exp Health Status/ (360714)
- 25 16 or 17 or 18 or 19 or 20 or 21 or 22 or 23 or 24 (1871410)
- 26 exp Child/ or child\*.mp. (2521414)
- 27 infant\*.mp. or exp Infant/ (1299261)
- 28 26 or 27 (3066826)
- 29 8 and 15 and 25 and 28 (135)
- 30 limit 29 to yr="2020 -Current" (122)

Database: Embase <2020 Week 1 to 2021 Week 16 & 2021 Week 17 to 2022 Week3>  
Search Strategy:

- 
- 1 exp Coronavirinae/ (46704)
  - 2 exp Coronavirus infection/ (125467)
  - 3 ("coronavirus disease 2019" or "severe acute respiratory syndrome coronavirus 2").sh,dj. (109570)
  - 4 ((corona\* or corono\*) adj1 (virus\* or viral\* or virinae\*)).ti,ab,kw. (2595)
  - 5 (coronavirus\* or coronovirus\* or coronavirinae\* or CoV).ti,ab,kw. (80523)
  - 6 ("2019-nCoV\*" or 2019nCoV\* or "19-nCoV\*" or 19nCoV\* or nCoV2019\* or "nCoV-2019\*" or nCoV19\* or "nCoV-19\*" or "COVID-19\*" or COVID19\* or "COVID-2019\*" or COVID2019\* or "HCoV-19\*" or HCoV19\* or "HCoV-2019\*" or HCoV2019\* or "2019 novel\*" or Ncov\* or "n-cov" or "SARS-CoV-2\*" or "SARSCoV-2\*" or "SARSCoV2\*" or "SARS-CoV2\*" or SARSCov19\* or "SARS-Cov19\*" or "SARSCov-19\*" or "SARS-Cov-19\*" or SARSCov2019\* or "SARS-Cov2019\*" or "SARSCov-2019\*" or "SARS-Cov-2019\*" or SARS2\* or "SARS-2\*" or SARSCoronavirus2\* or "SARS-coronavirus-2\*" or "SARSCoronavirus 2\*" or "SARS coronavirus2\*" or SARSCoronavirus2\* or "SARS-coronavirus-2\*" or "SARSCoronavirus 2\*" or "SARS coronavirus2\*" or covid).ti,ab,kw. (118765)
  - 7 (respiratory\* adj2 (symptom\* or disease\* or illness\* or condition\*) adj5 (Wuhan\* or Hubei\* or China\* or Chinese\* or Huanan\*)).ti,ab,kw. (403)
  - 8 (("seafood market\*" or "food market\*") adj10 (Wuhan\* or Hubei\* or China\* or Chinese\* or Huanan\*)).ti,ab,kw. (106)
  - 9 (pneumonia\* adj3 (Wuhan\* or Hubei\* or China\* or Chinese\* or Huanan\*)).ti,ab,kw. (652)
  - 10 ((outbreak\* or wildlife\* or pandemic\* or epidemic\*) adj1 (Wuhan\* or Hubei\* or China\* or Chinese\* or Huanan\*)).ti,ab,kw. (174)
  - 11 "severe acute respiratory syndrome".ti,ab,kw. (19474)
  - 12 or/1-11 (158644)
  - 13 limit 12 to yr="2019 -Current" (135192)
  - 14 limit 13 to medline (29810)
  - 15 13 not 14 (105382)
  - 16 exp vaccination/ or vaccin\*.mp. or exp vaccine/ (487379)
  - 17 mass vaccination.mp. or exp mass immunization/ (4974)
  - 18 exp virus vaccine/ or viral vaccine\*.mp. (158174)
  - 19 exp vaccination coverage/ (2769)
  - 20 exp immunization/ (284427)
  - 21 immuni\*.mp. (599955)
  - 22 16 or 17 or 18 or 19 or 20 or 21 (916665)

23 inequalit\*.mp. or exp inequality/ or exp socioeconomics/ (428529)  
 24 exp poverty/ or poverty.mp. (60661)  
 25 exp Healthcare Disparities/ or healthcare disparit\*.mp. (18297)  
 26 health services accessibility.mp. or exp health care access/ (70230)  
 27 exp income group/ or exp household income/ or exp family income/ or income.mp. or exp income/ (235109)  
 28 exp social class/ or social class.mp. (34744)  
 29 exp educational status/ (82957)  
 30 exp health status/ (256430)  
 31 socioeconomic\*.mp. or exp social status/ (359344)  
 32 23 or 24 or 25 or 26 or 27 or 28 or 29 or 30 or 31 (956674)  
 33 exp child/ or child\*.mp. (3181748)  
 34 exp infant/ or infant\*.mp. (1150614)  
 35 33 or 34 (3275646)  
 36 15 and 22 and 32 and 35 (128)  
 37 limit 36 to yr="2020 -Current" (125)

## Web of Science

|     |         |                                                                                                                                                                                                                                                                                                                                                                                                                                                                                                                                                                                                                                                                                         |
|-----|---------|-----------------------------------------------------------------------------------------------------------------------------------------------------------------------------------------------------------------------------------------------------------------------------------------------------------------------------------------------------------------------------------------------------------------------------------------------------------------------------------------------------------------------------------------------------------------------------------------------------------------------------------------------------------------------------------------|
| # 5 | 45      | #4 AND #3 AND #2 AND #1<br><i>Indexes=SCI-EXPANDED, SSCI, CPCI-S, CPCI-SSH Timespan=2020-2021</i>                                                                                                                                                                                                                                                                                                                                                                                                                                                                                                                                                                                       |
| # 4 | 145,119 | TOPIC: (child* or infant*)<br><i>Indexes=SCI-EXPANDED, SSCI, CPCI-S, CPCI-SSH Timespan=2020-2021</i>                                                                                                                                                                                                                                                                                                                                                                                                                                                                                                                                                                                    |
| # 3 | 74,234  | TOPIC:<br>(inequalit* or socioeconomic* or poverty or "healthcare disparit*" or "health service access*" or income or "social class*" or "social status*" or "educational status*" or "health status")<br><i>Indexes=SCI-EXPANDED, SSCI, CPCI-S, CPCI-SSH Timespan=2020-2021</i>                                                                                                                                                                                                                                                                                                                                                                                                        |
| # 2 | 51,856  | TOPIC: (vaccin* or immuni*)<br><i>Indexes=SCI-EXPANDED, SSCI, CPCI-S, CPCI-SSH Timespan=2020-2021</i>                                                                                                                                                                                                                                                                                                                                                                                                                                                                                                                                                                                   |
| # 1 | 100,169 | TS=(coronavirus* or coronaviridae or covid* or 2019-ncov or ncov19 or ncov-19 or 2019-novel CoV or sars-cov2 or sars-cov-2 or sarscov2 or sarscov-2 or SARS-2-nCoV or SARS-2-Cov or SARS-COV-19 or Sars-coronavirus2 or Sars-coronavirus-2 or SARS 2 coronavirus* or Severe Acute Respiratory Syndrome-CoV-2 or SARS-like coronavirus* or coronavirus-19 or covid19 or covid-19 or covid 2019) or TS=((novel or new or nouveau) AND (CoV or nCoV or covid or coronavirus* or corona virus or Pandemi*)) or TS=((covid or covid19 or covid-19 or SARS-CoV-2) and pandemic*) or TS=(coronavirus* and pneumonia)<br><i>Indexes=SCI-EXPANDED, SSCI, CPCI-S, CPCI-SSH Timespan=2020-2021</i> |

## The Cochrane Library (Numbers refer to 30/04/2021 run)

Date Run: 30/04/2021 & 20/01/2022

| ID  | Search                                                                                                                                         | Hits  |
|-----|------------------------------------------------------------------------------------------------------------------------------------------------|-------|
| #1  | MeSH descriptor: [Coronavirus] explode all trees                                                                                               | 264   |
| #2  | MeSH descriptor: [Coronavirus Infections] explode all trees                                                                                    | 828   |
| #3  | MeSH descriptor: [Coronaviridae] explode all trees                                                                                             | 266   |
| #4  | (Covid* or covid-19 or "covid19" or SARS-COV-2 or coronavirus* or "corona virus*" or sars-cov* OR sarscov* or sars-coronavirus*):ti,ab,kw 6210 |       |
| #5  | #1 or #2 or #3 or #4                                                                                                                           | 6231  |
| #6  | MeSH descriptor: [Vaccines] explode all trees                                                                                                  | 13126 |
| #7  | MeSH descriptor: [Vaccines] explode all trees                                                                                                  | 13126 |
| #8  | MeSH descriptor: [Mass Vaccination] explode all trees                                                                                          | 37    |
| #9  | MeSH descriptor: [Viral Vaccines] explode all trees                                                                                            | 5288  |
| #10 | MeSH descriptor: [Vaccination Coverage] explode all trees                                                                                      | 26    |

|     |                                                                           |        |  |
|-----|---------------------------------------------------------------------------|--------|--|
| #11 | MeSH descriptor: [Immunity] explode all trees                             | 4024   |  |
| #12 | MeSH descriptor: [Immunization Programs] explode all trees                | 219    |  |
| #13 | (vaccin* or immuni*):ti,ab,kw                                             | 33243  |  |
| #14 | #6 or #7 or #8 or #9 or #10 or #11 or #12 or #13                          | 34334  |  |
| #15 | #5 and #14                                                                | 640    |  |
| #16 | MeSH descriptor: [Socioeconomic Factors] explode all trees                | 9960   |  |
| #17 | MeSH descriptor: [Poverty] explode all trees                              | 1766   |  |
| #18 | MeSH descriptor: [Healthcare Disparities] explode all trees               | 187    |  |
| #19 | MeSH descriptor: [Health Services Accessibility] explode all trees        | 981    |  |
| #20 | MeSH descriptor: [Income] explode all trees                               | 989    |  |
| #21 | MeSH descriptor: [Social Class] explode all trees                         | 651    |  |
| #22 | MeSH descriptor: [Educational Status] explode all trees                   | 1476   |  |
| #23 | MeSH descriptor: [Health Status Disparities] explode all trees            | 167    |  |
| #24 | MeSH descriptor: [Social Determinants of Health] explode all trees        | 22     |  |
| #25 | (inequalit* or poverty or social status):ti,ab,kw                         | 13342  |  |
| #26 | MeSH descriptor: [Health Status] explode all trees                        | 30702  |  |
| #27 | #16 or #17 or #18 or #19 or #20 or #21 or #22 or #23 or #24 or #25 or #26 | 49351  |  |
| #28 | #15 and #27                                                               | 16     |  |
| #29 | (child* or infant*):ti,ab,kw                                              | 192664 |  |
| #30 | #28 and #29                                                               | 2      |  |

#### Sociological Abstracts.

```
noft(Covid* OR covid-19 OR "covid19" OR SARS-COV-2 OR coronavirus* OR "corona virus*" OR sars-cov* OR sarscov* OR sars-coronavirus*) AND (MAINSUBJECT.EXACT.EXPLODE("Vaccination") OR noft(vaccin* OR immuni*)) AND ((MAINSUBJECT.EXACT.EXPLODE("Income Inequality") OR MAINSUBJECT.EXACT.EXPLODE("Inequality") OR MAINSUBJECT.EXACT.EXPLODE("Social Inequality") OR MAINSUBJECT.EXACT.EXPLODE("Educational Inequality")) OR (MAINSUBJECT.EXACT.EXPLODE("Socioeconomic Factors") OR MAINSUBJECT.EXACT.EXPLODE("Socioeconomic Status")) OR MAINSUBJECT.EXACT.EXPLODE("Poverty") OR (MAINSUBJECT.EXACT.EXPLODE("Income Inequality") OR MAINSUBJECT.EXACT.EXPLODE("Income")) OR MAINSUBJECT.EXACT.EXPLODE("Social Class") OR noft(inequalit* OR poverty OR income OR "social class" OR "educational status" OR "healthcare disparit*" OR "social status" OR socioeconomic OR "health services access*")) AND noft(infant* or child|*)
```

#### ASSIA

```
noft(Covid* OR covid-19 OR "covid19" OR SARS-COV-2 OR coronavirus* OR "corona virus*" OR sars-cov* OR sarscov* OR sars-coronavirus*) AND ((MAINSUBJECT.EXACT.EXPLODE("Vaccines") OR MAINSUBJECT.EXACT.EXPLODE("Combined vaccines")) OR noft(vaccin* OR immuni*) OR MAINSUBJECT.EXACT.EXPLODE("Immunization")) AND ((MAINSUBJECT.EXACT.EXPLODE("Income inequalities") OR MAINSUBJECT.EXACT.EXPLODE("Inequalities") OR MAINSUBJECT.EXACT.EXPLODE("Health inequalities") OR MAINSUBJECT.EXACT.EXPLODE("Economic inequalities") OR MAINSUBJECT.EXACT.EXPLODE("Social inequalities") OR MAINSUBJECT.EXACT.EXPLODE("Racial inequalities")) OR MAINSUBJECT.EXACT.EXPLODE("Poverty") OR MAINSUBJECT.EXACT.EXPLODE("Social class") OR MAINSUBJECT.EXACT.EXPLODE("Health status"))
```

OR noft(inequalit\* OR poverty OR "social class" OR "social status" OR income OR socioeconomic OR "educational status" OR "health status" OR "health services access\*" OR "health disparit\*")) AND noft(infant\* or child\*)

WHO Global Research on Corona Virus (COVID-19) accessed 1 May 2021 and 20 January 2022 at (<https://www.who.int/emergencies/diseases/novel-coronavirus-2019/global-research-on-novel-coronavirus-2019-ncov> using key words: "routine childhood vaccination coverage".

| Characteristics of publication |                               |          |                    |               | Population and sampling                       |                 |             | Routine childhood vaccines studied | Inequity                                                                                                         | Analysis                                                    | Results                                                                                                                                                        |
|--------------------------------|-------------------------------|----------|--------------------|---------------|-----------------------------------------------|-----------------|-------------|------------------------------------|------------------------------------------------------------------------------------------------------------------|-------------------------------------------------------------|----------------------------------------------------------------------------------------------------------------------------------------------------------------|
| No.                            | Country/<br>Countries studied | Citation | Research objective | Type of study | Population & months of COVID pandemic studied | Sampling method | Sample size | Routine childhood vaccines studied | Socioeconomic status, poverty/wealth, indigenous group, ethnic group measured at individual &/or regional level) | Methods of analysis of inequity and measures of effect used | Population-level reductions in routine vaccination coverage by individual vaccine<br>Reductions by inequity measures with effect size estimates where reported |

**Table S1: Data extraction spreadsheet headings**

| Section and Topic             | Item # | Checklist item                                                                                                                                                                                                                                                                                       | Location where item is reported [lines] |
|-------------------------------|--------|------------------------------------------------------------------------------------------------------------------------------------------------------------------------------------------------------------------------------------------------------------------------------------------------------|-----------------------------------------|
| <b>TITLE</b>                  |        |                                                                                                                                                                                                                                                                                                      |                                         |
| Title                         | 1      | Identify the report as a systematic review.                                                                                                                                                                                                                                                          | 1-2                                     |
| <b>ABSTRACT</b>               |        |                                                                                                                                                                                                                                                                                                      |                                         |
| Abstract                      | 2      | See the PRISMA 2020 for Abstracts checklist.                                                                                                                                                                                                                                                         | 28-48                                   |
| <b>INTRODUCTION</b>           |        |                                                                                                                                                                                                                                                                                                      |                                         |
| Rationale                     | 3      | Describe the rationale for the review in the context of existing knowledge.                                                                                                                                                                                                                          | 52-66                                   |
| Objectives                    | 4      | Provide an explicit statement of the objective(s) or question(s) the review addresses.                                                                                                                                                                                                               | 67-78                                   |
| <b>METHODS</b>                |        |                                                                                                                                                                                                                                                                                                      |                                         |
| Eligibility criteria          | 5      | Specify the inclusion and exclusion criteria for the review and how studies were grouped for the syntheses.                                                                                                                                                                                          | 100-106<br>See Panel                    |
| Information sources           | 6      | Specify all databases, registers, websites, organisations, reference lists and other sources searched or consulted to identify studies. Specify the date when each source was last searched or consulted.                                                                                            | 87-92                                   |
| Search strategy               | 7      | Present the full search strategies for all databases, registers and websites, including any filters and limits used.                                                                                                                                                                                 | 93-99                                   |
| Selection process             | 8      | Specify the methods used to decide whether a study met the inclusion criteria of the review, including how many reviewers screened each record and each report retrieved, whether they worked independently, and if applicable, details of automation tools used in the process.                     | 108-112                                 |
| Data collection process       | 9      | Specify the methods used to collect data from reports, including how many reviewers collected data from each report, whether they worked independently, any processes for obtaining or confirming data from study investigators, and if applicable, details of automation tools used in the process. | 108-112                                 |
| Data items                    | 10a    | List and define all outcomes for which data were sought. Specify whether all results that were compatible with each outcome domain in each study were sought (e.g. for all measures, time points, analyses), and if not, the methods used to decide which results to collect.                        | 125-130<br>Panel                        |
|                               | 10b    | List and define all other variables for which data were sought (e.g. participant and intervention characteristics, funding sources). Describe any assumptions made about any missing or unclear information.                                                                                         | Table 1                                 |
| Study risk of bias assessment | 11     | Specify the methods used to assess risk of bias in the included studies, including details of the tool(s) used, how many reviewers assessed each study and whether they worked independently, and if applicable, details of automation tools used in the process.                                    | 136-139                                 |
| Effect measures               | 12     | Specify for each outcome the effect measure(s) (e.g. risk ratio, mean difference) used in the synthesis or presentation of results.                                                                                                                                                                  |                                         |
| Synthesis methods             | 13a    | Describe the processes used to decide which studies were eligible for each synthesis (e.g. tabulating the study intervention characteristics and comparing against the planned groups for each synthesis (item #5)).                                                                                 | Table 2                                 |
|                               | 13b    | Describe any methods required to prepare the data for presentation or synthesis, such as handling of missing summary statistics, or data conversions.                                                                                                                                                | N/A                                     |



| Section and Topic             | Item # | Checklist item                                                                                                                                                                                                                                                                       | Location where item is reported [lines] |
|-------------------------------|--------|--------------------------------------------------------------------------------------------------------------------------------------------------------------------------------------------------------------------------------------------------------------------------------------|-----------------------------------------|
|                               | 13c    | Describe any methods used to tabulate or visually display results of individual studies and syntheses.                                                                                                                                                                               | Tables 1&2                              |
|                               | 13d    | Describe any methods used to synthesize results and provide a rationale for the choice(s). If meta-analysis was performed, describe the model(s), method(s) to identify the presence and extent of statistical heterogeneity, and software package(s) used.                          | 118-120                                 |
|                               | 13e    | Describe any methods used to explore possible causes of heterogeneity among study results (e.g. subgroup analysis, meta-regression).                                                                                                                                                 | N/A                                     |
|                               | 13f    | Describe any sensitivity analyses conducted to assess robustness of the synthesized results.                                                                                                                                                                                         | N/A                                     |
| Reporting bias assessment     | 14     | Describe any methods used to assess risk of bias due to missing results in a synthesis (arising from reporting biases).                                                                                                                                                              | N/A                                     |
| Certainty assessment          | 15     | Describe any methods used to assess certainty (or confidence) in the body of evidence for an outcome.                                                                                                                                                                                | 122-4                                   |
| <b>RESULTS</b>                |        |                                                                                                                                                                                                                                                                                      |                                         |
| Study selection               | 16a    | Describe the results of the search and selection process, from the number of records identified in the search to the number of studies included in the review, ideally using a flow diagram.                                                                                         | 142-4<br>Figure 1                       |
|                               | 16b    | Cite studies that might appear to meet the inclusion criteria, but which were excluded, and explain why they were excluded.                                                                                                                                                          | 144-151                                 |
| Study characteristics         | 17     | Cite each included study and present its characteristics.                                                                                                                                                                                                                            | 153-178                                 |
| Risk of bias in studies       | 18     | Present assessments of risk of bias for each included study.                                                                                                                                                                                                                         | 187-190<br>Table 3                      |
| Results of individual studies | 19     | For all outcomes, present, for each study: (a) summary statistics for each group (where appropriate) and (b) an effect estimate and its precision (e.g. confidence/credible interval), ideally using structured tables or plots.                                                     | Table 2                                 |
| Results of syntheses          | 20a    | For each synthesis, briefly summarise the characteristics and risk of bias among contributing studies.                                                                                                                                                                               | Table 1                                 |
|                               | 20b    | Present results of all statistical syntheses conducted. If meta-analysis was done, present for each the summary estimate and its precision (e.g. confidence/credible interval) and measures of statistical heterogeneity. If comparing groups, describe the direction of the effect. | Narrative synthesis:<br>198-336         |
|                               | 20c    | Present results of all investigations of possible causes of heterogeneity among study results.                                                                                                                                                                                       | n/a                                     |
|                               | 20d    | Present results of all sensitivity analyses conducted to assess the robustness of the synthesized results.                                                                                                                                                                           | n/a                                     |
| Reporting biases              | 21     | Present assessments of risk of bias due to missing results (arising from reporting biases) for each synthesis assessed.                                                                                                                                                              | n/a                                     |
| Certainty of evidence         | 22     | Present assessments of certainty (or confidence) in the body of evidence for each outcome assessed.                                                                                                                                                                                  | 339-407                                 |

| Section and Topic                              | Item # | Checklist item                                                                                                                                                                                                                             | Location where item is reported [lines]                                                                |
|------------------------------------------------|--------|--------------------------------------------------------------------------------------------------------------------------------------------------------------------------------------------------------------------------------------------|--------------------------------------------------------------------------------------------------------|
| <b>DISCUSSION</b>                              |        |                                                                                                                                                                                                                                            |                                                                                                        |
| Discussion                                     | 23a    | Provide a general interpretation of the results in the context of other evidence.                                                                                                                                                          | 418-453                                                                                                |
|                                                | 23b    | Discuss any limitations of the evidence included in the review.                                                                                                                                                                            | 418-421                                                                                                |
|                                                | 23c    | Discuss any limitations of the review processes used.                                                                                                                                                                                      | 454-464                                                                                                |
|                                                | 23d    | Discuss implications of the results for practice, policy, and future research.                                                                                                                                                             | 465-482                                                                                                |
| <b>OTHER INFORMATION</b>                       |        |                                                                                                                                                                                                                                            |                                                                                                        |
| Registration and protocol                      | 24a    | Provide registration information for the review, including register name and registration number, or state that the review was not registered.                                                                                             | 83-4                                                                                                   |
|                                                | 24b    | Indicate where the review protocol can be accessed, or state that a protocol was not prepared.                                                                                                                                             | Available at:<br><a href="https://www.crd.york.ac.uk/PROSPERO">https://www.crd.york.ac.uk/PROSPERO</a> |
|                                                | 24c    | Describe and explain any amendments to information provided at registration or in the protocol.                                                                                                                                            |                                                                                                        |
| Support                                        | 25     | Describe sources of financial or non-financial support for the review, and the role of the funders or sponsors in the review.                                                                                                              | 491                                                                                                    |
| Competing interests                            | 26     | Declare any competing interests of review authors.                                                                                                                                                                                         | 504                                                                                                    |
| Availability of data, code and other materials | 27     | Report which of the following are publicly available and where they can be found: template data collection forms; data extracted from included studies; data used for all analyses; analytic code; any other materials used in the review. | Supp table S1<br>Obtain from authors                                                                   |

From: Page MJ, McKenzie JE, Bossuyt PM, Boutron I, Hoffmann TC, Mulrow CD, et al. The PRISMA 2020 statement: an updated guideline for reporting systematic reviews. BMJ 2021;372:n71. doi: 10.1136/bmj.n71

**Table S2: PRISMA 2020 Checklist**
